# Supplementary material for: A self-assembling nanoparticle vaccine targeting the conserved epitope of influenza virus hemagglutinin stem elicits a cross-protective immune response
Source: Royal Society of Chemistry journal article supplement (doi:10.1039/d1nr08460g), 2022-01-01
Supplement: d1nr08460g1.pdf [file d1nr08460g1.pdf]

## Supporting information

# Self-assembling nanoparticle vaccine targeting the conserved epitope of influenza virus hemagglutinin stem elicits cross-protective immune response

Yongbo Qiao,<sup>a</sup> Shuang Li,<sup>a</sup> Shenghui Jin,<sup>a</sup> Yi Pan,<sup>a</sup> Yuhua Shi,<sup>a</sup> Wei Kong<sup>a,b</sup> and Yaming Shan<sup>\*a,b</sup>

<sup>a</sup> National Engineering Laboratory for AIDS Vaccine, School of Life Sciences, Jilin University, Changchun, Jilin 130012, China. E-mail: shanym@jlu.edu.cn

<sup>b</sup> Key Laboratory for Molecular Enzymology and Engineering, The Ministry of Education, School of Life Sciences, Jilin University, Changchun, Jilin 130012, China.

**Table S1. Primer information**

| Primer | Gene sequence (5'-3')                        |
|--------|----------------------------------------------|
| P1     | AAGAAGGAGATATACATATGGACCTTAAGTCCACCCAGGCT    |
| P2     | TCTCCAGATCCTGGATACGAGAACCGCCAATAACACGATT     |
| P3     | ATCGTGTTATTGGCGTTCTCGTATCCAGGATCTGGAGAAGTAC  |
| P4     | GTGGTGGTGGTGGTCTCGAGTTAATGGTGATGGTGATGATGAGA |
| P5     | GGAATCCATATGCTGAGCAAGGACATCATC               |

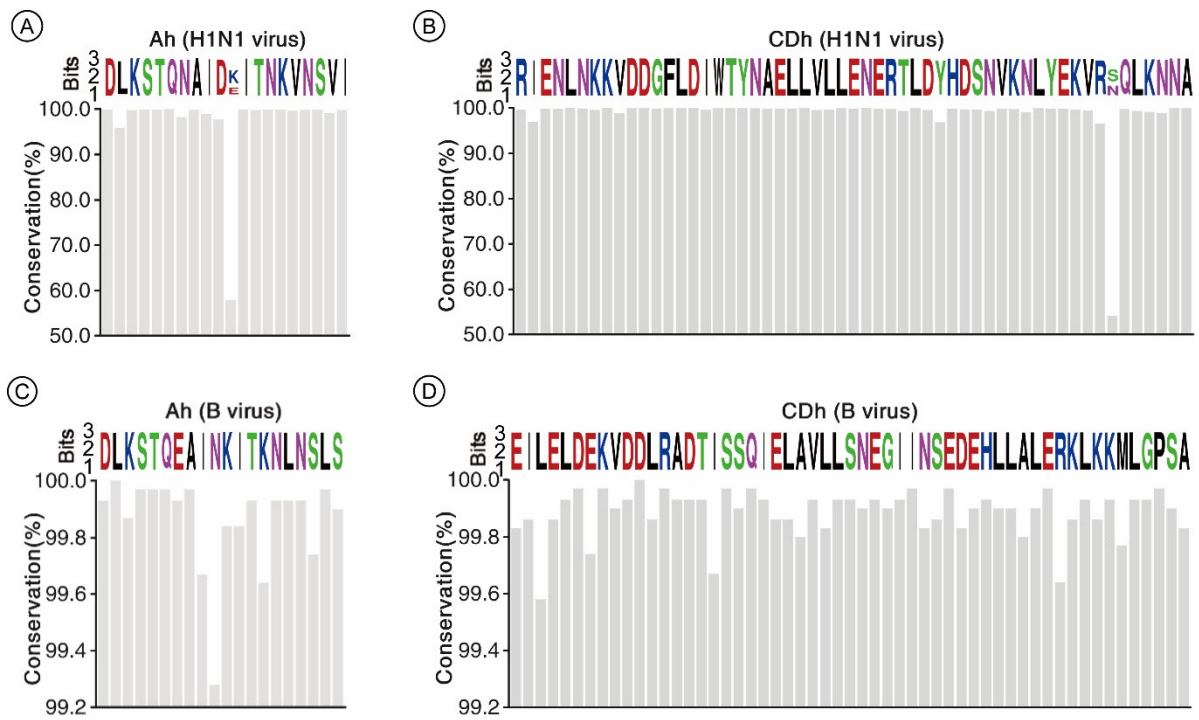

Figure S1. Analysis of sequence conservation. Ah (A and C) and CDh (B and D) from H1N1 and B influenza viruses. The plot shows the sequence conservation level in bits (sequence logo) and percentages (histogram).

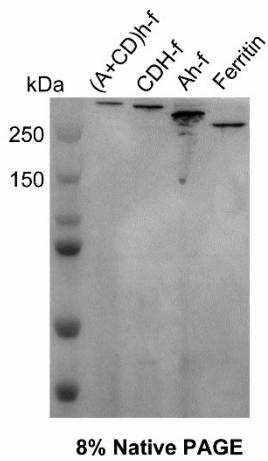

Figure S2. Native PAGE analysis of protein NPs. Native PAGE (8%) and coomassie blue staining of ferritin, Ah-f, CDh-f, and (A+CD)h-f NPs.

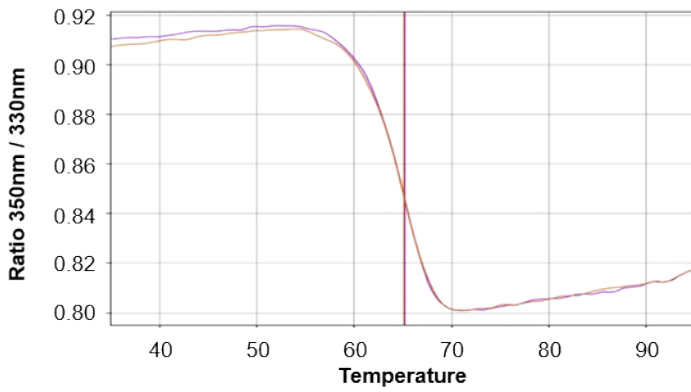

Figure S3. Unfolding profiles of freshly purified CDh-f (red) and the CDh-f stored at  $-80^{\circ}\text{C}$  for 6 months (purple).

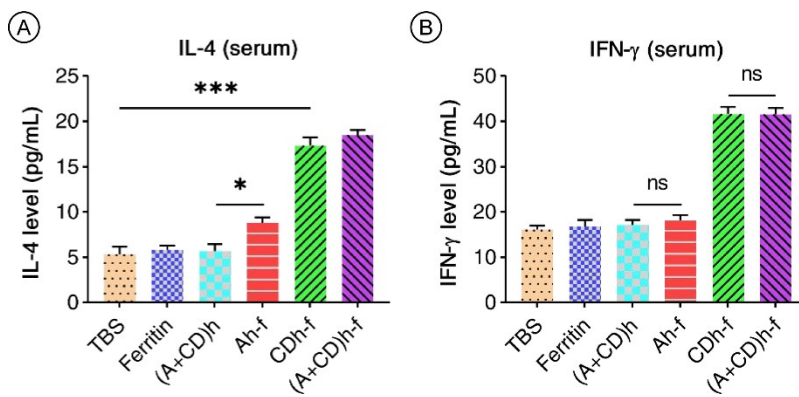

Figure S4. Concentrations of cytokines IL-4 and IFN- $\gamma$  in sera from immunized mice. (A) The concentration of IL-4,  $n = 6$ . (B) The concentration of IFN- $\gamma$ ,  $n = 6$ . NS: not significant,  $*P < 0.05$ ,  $***P < 0.001$ .

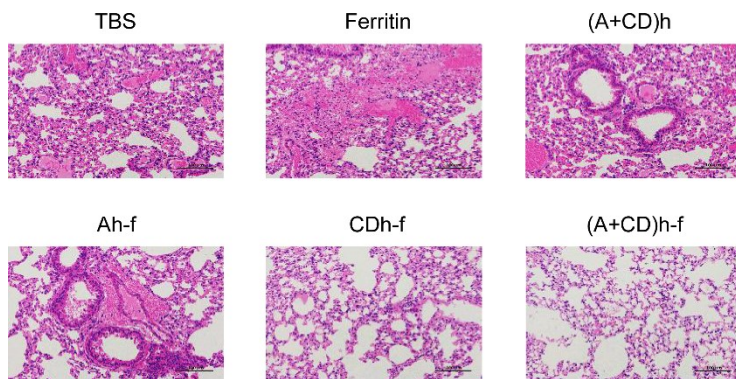

Figure S5. Lungs were collected on Day 4 post challenge for lung injury analysis by H&E staining.
